# Supplementary material for: Long non-coding RNA SNHG1 activates HOXA1 expression via sponging miR-193a-5p in breast cancer progression
Source: publisher site journal article supplement (doi:10.18632/aging.103123), 2020-06-03
Supplement: Supplementary file [file aging-v12i11-103123-supplementary-material-SD1.pdf]

SUPPLEMENTARY FIGURES

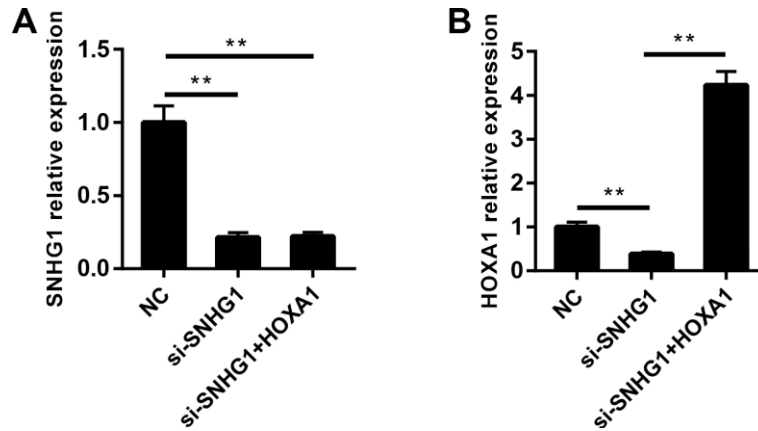

**Supplementary Figure 1. SNHG1 and HOXA1 expression in NC, si-SNHG1 and si-SNHG1+HOXA1 cells.** (A, B) The expression of SNHG1 (A) and HOXA1 (B) in MDA-MB-231 cells transfected with NC, si-SNHG1 and si-SNHG1+HOXA1 were examined using Q-RT-PCR. \*\* $p < 0.01$  compared with indicated control.

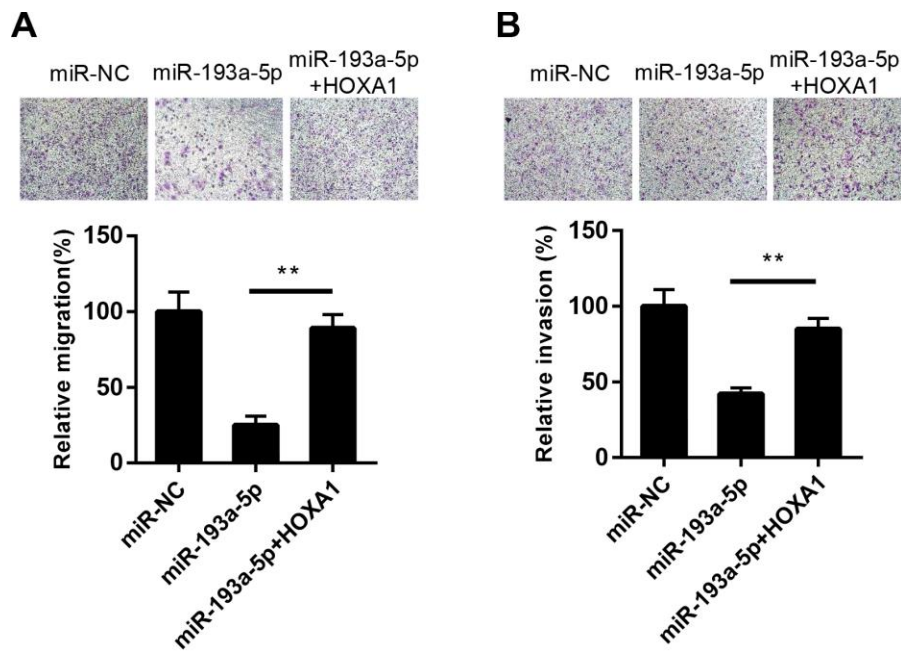

**Supplementary Figure 2. Ectopic expression of HOXA1 reversed migration and invasion capacities of miR-193a-5p transfected MDA-MB-231 cells.** (A, B) Migration (A) and invasion (B) of MDA-MB-231 cells transfected with NC, miR-193a-5p and miR-193a-5p+HOXA1 were examined by transwell assay. Representative images of the cells migrated or invaded to the lower chamber side (top panel). Cell migration and invasion capacities were shown as a percentage of miR-NC control (bottom panel). \*\* $p < 0.01$  compared with miR-193a-5p transfection group.
